# Supplementary material
Source: PubMed Central journal article supplement (PMC4899105)
Supplement: NIHMS772449-supplement-ESI.pdf [file NIHMS772449-supplement-ESI.pdf]

Supplementary Information for

**Single-cell Mass Spectrometry with Multi-solvent Extraction Identifies  
Metabolic Differences between Left and Right Blastomeres in the 8-cell  
Frog (*Xenopus*) Embryo**

Rosemary M. Onjiko<sup>1</sup>, Sydney E. Morris<sup>1</sup>, Sally A. Moody<sup>2</sup>, and Peter Nemes<sup>1\*</sup>

<sup>1</sup>Department of Chemistry and <sup>2</sup>Department of Anatomy & Regenerative Biology,  
The George Washington University, Washington DC, 20052

\*Correspondence to: Peter Nemes, Department of Chemistry, The George Washington  
University, 800 22nd Street, NW, Suite 4000, Washington, DC 20052, USA, (Tel) (1) 202-994-  
5663, [petern@gwu.edu](mailto:petern@gwu.edu)

**Table of Contents**

|                 |   |
|-----------------|---|
| Table S1. ....  | 2 |
| Table S2. ....  | 3 |
| Table S3. ....  | 5 |
| Table S4. ....  | 6 |
| Figure S1. .... | 7 |
| Figure S2. .... | 8 |

**Table S1.** Molecular features repeatedly detected in D1R blastomeres in 8-cell *Xenopus* embryos, listed as accurate mass (separation time, min) values. Identified features are in bold (see **Table S2**). Features highlighted in grey mark ions that were used for multivariate and statistical analyses.

|                         |                         |                         |                         |                         |
|-------------------------|-------------------------|-------------------------|-------------------------|-------------------------|
| <b>146.1655 (10.03)</b> | <b>89.1072 (10.44)</b>  | 221.9824 (12.29)        | 151.0450 (12.30)        | 277.0252 (12.30)        |
| 230.0960 (12.31)        | 180.1496 (13.40)        | 393.9036 (13.55)        | 214.1337 (13.64)        | 194.1650 (13.88)        |
| <b>62.0599 (14.07)</b>  | 144.0479 (14.45)        | <b>265.1115 (14.45)</b> | <b>104.1072 (15.20)</b> | 255.1550 (15.33)        |
| <b>246.1562 (15.65)</b> | <b>234.1448 (15.70)</b> | <b>262.1505 (16.02)</b> | <b>399.1443 (16.03)</b> | <b>133.0971 (16.24)</b> |
| <b>147.1126 (16.39)</b> | <b>90.0545 (16.43)</b>  | <b>161.1288 (16.52)</b> | <b>175.1186 (16.89)</b> | <b>104.0705 (17.07)</b> |
| <b>189.1596 (17.10)</b> | <b>156.0766 (17.14)</b> | <b>146.1174 (17.78)</b> | 143.1171 (17.78)        | <b>150.1123 (17.79)</b> |
| 164.1280 (17.79)        | 184.1120 (17.79)        | 104.0705 (17.86)        | <b>139.0502 (18.54)</b> | 141.0654 (18.56)        |
| <b>152.0566 (18.79)</b> | 261.9759 (18.90)        | 276.9870 (18.91)        | <b>162.1124 (18.98)</b> | <b>139.0502 (19.44)</b> |
| 141.0654 (19.48)        | 134.1170 (19.50)        | <b>166.0729 (19.75)</b> | 150.0551 (19.82)        | 194.1540 (20.18)        |
| <b>204.1227 (20.88)</b> | 210.1501 (21.09)        | 190.1435 (21.21)        | 174.1273 (21.26)        | <b>218.1389 (21.64)</b> |
| <b>76.0393 (21.67)</b>  | <b>148.0600 (21.69)</b> | 226.1445 (21.81)        | <b>132.0774 (21.98)</b> | 208.1543 (22.23)        |
| 230.1175 (22.73)        | 262.1646 (23.77)        | <b>90.0545 (23.89)</b>  | <b>291.1289 (25.17)</b> | <b>118.0861 (27.34)</b> |
| <b>132.1024 (27.66)</b> | <b>106.0501 (27.66)</b> | 425.1888 (27.87)        | <b>132.1024 (28.01)</b> | <b>120.0652 (29.43)</b> |
| <b>133.0608 (29.45)</b> | <b>188.0702 (29.99)</b> | <b>205.0964 (29.99)</b> | <b>150.0589 (30.14)</b> | <b>147.0768 (30.25)</b> |
| 116.0705 (30.33)        | <b>162.0760 (30.35)</b> | <b>162.0759 (30.64)</b> | <b>159.0759 (30.65)</b> | <b>176.1027 (30.68)</b> |
| <b>190.1174 (30.75)</b> | <b>148.0600 (30.78)</b> | <b>166.0862 (31.34)</b> | 286.3101 (31.39)        | <b>189.1236 (31.63)</b> |
| <b>182.0812 (31.78)</b> | <b>116.0704 (32.38)</b> | 261.9759 (32.43)        | 243.9614 (32.53)        | <b>137.0458 (32.59)</b> |
| 187.1073 (32.82)        | <b>205.1181 (32.95)</b> | <b>134.0454 (34.29)</b> | <b>118.0860 (35.02)</b> | <b>307.0836 (35.72)</b> |
| 369.0052 (39.14)        | <b>308.0907 (39.15)</b> |                         |                         |                         |

**Table S2.** Metabolites identified using single-cell CE-ESI-MS and multi-solvent small-molecule extraction. Unless noted, metabolite signals were singly protonated.

| <b>ID</b> | <b>Metabolite (Abbrev.)</b> |       | <b>Formula</b>                                                  | <b>t<sub>m</sub><br/>(min)</b> | <b>m/z<br/>measured</b> | <b>m/z<br/>theoretical</b> | <b>Δm/z<br/>(mDa)</b> | <b>Δm/z<br/>(ppm)</b> |
|-----------|-----------------------------|-------|-----------------------------------------------------------------|--------------------------------|-------------------------|----------------------------|-----------------------|-----------------------|
| <b>1</b>  | Spermidine**                |       | C <sub>7</sub> H <sub>19</sub> N <sub>3</sub>                   | 10.03                          | 146.1655                | 146.1652                   | 0.3                   | 2.2                   |
| <b>2</b>  | Putrescine <sup>‡</sup>     |       | C <sub>4</sub> H <sub>12</sub> N <sub>2</sub>                   | 10.44                          | 89.1072                 | 89.1073                    | 0.1                   | 1.4                   |
| <b>3</b>  | Ethanolamine <sup>‡</sup>   | EA    | C <sub>2</sub> H <sub>7</sub> NO                                | 14.07                          | 62.0599                 | 62.0600                    | 0.1                   | 2.3                   |
| <b>4</b>  | Thiamine**                  |       | C <sub>12</sub> H <sub>16</sub> N <sub>4</sub> OS               | 14.45                          | 265.1115                | 265.1118                   | 0.3                   | 1.0                   |
| <b>5</b>  | Choline***                  | Cho   | C <sub>5</sub> H <sub>13</sub> NO <sup>(+)</sup>                | 15.20                          | 104.1072                | 104.1070                   | 0.2                   | 2.0                   |
| <b>6</b>  | Arg-Ala**                   | RA    | C <sub>9</sub> H <sub>19</sub> N <sub>5</sub> O <sub>3</sub>    | 15.65                          | 246.1562                | 246.1561                   | 0.1                   | 0.5                   |
| <b>7</b>  | Lys-Ser**                   | KS    | C <sub>9</sub> H <sub>19</sub> N <sub>3</sub> O <sub>4</sub>    | 15.70                          | 234.1448                | 234.1448                   | 0.0                   | 0.1                   |
| <b>8</b>  | Ser-Arg**                   | SR    | C <sub>9</sub> H <sub>19</sub> N <sub>5</sub> O <sub>4</sub>    | 16.02                          | 262.1505                | 262.1510                   | 0.5                   | 1.8                   |
| <b>9</b>  | S-adenosyl-methionine**     | SAM   | C <sub>15</sub> H <sub>22</sub> N <sub>6</sub> O <sub>5</sub> S | 16.03                          | 399.1443                | 399.1445                   | 0.2                   | 0.5                   |
| <b>10</b> | Ornithine**                 | Orn   | C <sub>5</sub> H <sub>12</sub> N <sub>2</sub> O <sub>2</sub>    | 16.24                          | 133.0971                | 133.0972                   | 0.1                   | 0.4                   |
| <b>11</b> | Lysine***                   | Lys   | C <sub>6</sub> H <sub>14</sub> N <sub>2</sub> O <sub>2</sub>    | 16.39                          | 147.1126                | 147.1128                   | 0.2                   | 1.4                   |
| <b>12</b> | Sarcosine <sup>‡</sup>      | Sar   | C <sub>3</sub> H <sub>7</sub> NO <sub>2</sub>                   | 16.43                          | 90.0545                 | 90.0550                    | 0.5                   | 5.1                   |
| <b>13</b> | Homolysine**                |       | C <sub>7</sub> H <sub>16</sub> N <sub>2</sub> O <sub>2</sub>    | 16.52                          | 161.1288                | 161.1285                   | 0.3                   | 2.1                   |
| <b>14</b> | Arginine***                 | Arg   | C <sub>6</sub> H <sub>14</sub> N <sub>4</sub> O <sub>2</sub>    | 16.89                          | 175.1186                | 175.1190                   | 0.4                   | 2.0                   |
| <b>15</b> | γ-aminobutyric acid*        | GABA  | C <sub>4</sub> H <sub>9</sub> NO <sub>2</sub>                   | 17.07                          | 104.0705                | 104.0706                   | 0.1                   | 1.0                   |
| <b>16</b> | N6,N6,N6-trimethyl-lysine** | TML   | C <sub>9</sub> H <sub>20</sub> N <sub>2</sub> O <sub>2</sub>    | 17.10                          | 189.1596                | 189.1598                   | 0.2                   | 0.8                   |
| <b>17</b> | Histidine***                | His   | C <sub>6</sub> H <sub>9</sub> N <sub>3</sub> O <sub>2</sub>     | 17.14                          | 156.0766                | 156.0768                   | 0.2                   | 1.0                   |
| <b>18</b> | Acetylcholine***            | AcCho | C <sub>7</sub> H <sub>15</sub> NO <sub>2</sub> <sup>(+)</sup>   | 17.78                          | 146.1174                | 146.1176                   | 0.2                   | 1.1                   |
| <b>19</b> | Trolamine <sup>‡</sup>      | TEA   | C <sub>6</sub> H <sub>15</sub> NO <sub>3</sub>                  | 17.79                          | 150.1123                | 150.1125                   | 0.2                   | 1.1                   |
| <b>20</b> | Cis-urocanate**             | cURA  | C <sub>6</sub> H <sub>6</sub> N <sub>2</sub> O <sub>2</sub>     | 18.54                          | 139.0502                | 139.0502                   | 0.0                   | 0.0                   |
| <b>21</b> | Guanine**                   |       | C <sub>5</sub> H <sub>5</sub> N <sub>5</sub> O                  | 18.79                          | 152.0566                | 152.0567                   | 0.1                   | 0.6                   |
| <b>22</b> | Carnitine***                | Car   | C <sub>7</sub> H <sub>15</sub> NO <sub>3</sub>                  | 18.98                          | 162.1124                | 162.1125                   | 0.1                   | 0.4                   |
| <b>23</b> | Trans-urocanate**           | tURA  | C <sub>6</sub> H <sub>6</sub> N <sub>2</sub> O <sub>2</sub>     | 19.44                          | 139.0502                | 139.0502                   | 0.0                   | 0.0                   |
| <b>24</b> | Methyl guanine**            |       | C <sub>6</sub> H <sub>7</sub> N <sub>5</sub> O                  | 19.75                          | 166.0729                | 166.0723                   | 0.6                   | 3.4                   |
| <b>25</b> | Acetylcarnitine***          | AcCar | C <sub>9</sub> H <sub>17</sub> NO <sub>4</sub>                  | 20.88                          | 204.1227                | 204.1230                   | 0.3                   | 1.6                   |
| <b>26</b> | Propionylcarnitine**        |       | C <sub>10</sub> H <sub>19</sub> NO <sub>4</sub>                 | 21.64                          | 218.1389                | 218.1387                   | 0.2                   | 1.0                   |
| <b>27</b> | Glycine*                    | Gly   | C <sub>2</sub> H <sub>5</sub> NO <sub>2</sub>                   | 21.67                          | 76.0393                 | 76.0393                    | 0.0                   | 0.1                   |
| <b>28</b> | N-Methyl-aspartic acid**    |       | C <sub>5</sub> H <sub>9</sub> NO <sub>4</sub>                   | 21.69                          | 148.0600                | 148.0604                   | 0.4                   | 3.0                   |
| <b>29</b> | Creatine***                 | CR    | C <sub>4</sub> H <sub>9</sub> N <sub>3</sub> O <sub>2</sub>     | 21.98                          | 132.0774                | 132.0768                   | 0.6                   | 5.0                   |
| <b>30</b> | Alanine*                    | Ala   | C <sub>3</sub> H <sub>7</sub> NO <sub>2</sub>                   | 23.89                          | 90.0545                 | 90.0550                    | 0.5                   | 5.0                   |
| <b>31</b> | Arginino-succinate**        |       | C <sub>10</sub> H <sub>18</sub> N <sub>4</sub> O <sub>6</sub>   | 25.17                          | 291.1289                | 291.1299                   | 1.0                   | 3.5                   |
| <b>32</b> | Valine***                   | Val   | C <sub>5</sub> H <sub>11</sub> NO <sub>2</sub>                  | 27.34                          | 118.0861                | 118.0863                   | 0.2                   | 1.3                   |
| <b>33</b> | Isoleucine*                 | Ile   | C <sub>6</sub> H <sub>13</sub> NO <sub>2</sub>                  | 27.66                          | 132.1024                | 132.1019                   | 0.5                   | 3.8                   |
| <b>34</b> | Serine***                   | Ser   | C <sub>3</sub> H <sub>7</sub> NO <sub>3</sub>                   | 27.66                          | 106.0501                | 106.0499                   | 0.2                   | 2.2                   |

| ID        | Metabolite (Abbrev.)          |      | Formula                                                                                         | t <sub>m</sub><br>(min) | m/z<br>measured | m/z<br>theoretical | Δm/z<br>(mDa) | Δm/z<br>(ppm) |
|-----------|-------------------------------|------|-------------------------------------------------------------------------------------------------|-------------------------|-----------------|--------------------|---------------|---------------|
| <b>35</b> | Leucine*                      | Leu  | C <sub>6</sub> H <sub>13</sub> NO <sub>2</sub>                                                  | 28.01                   | 132.1024        | 132.1019           | 0.5           | 3.8           |
| <b>36</b> | Threonine***                  | Thr  | C <sub>4</sub> H <sub>9</sub> NO <sub>3</sub>                                                   | 29.43                   | 120.0652        | 120.0655           | 0.3           | 2.7           |
| <b>37</b> | Asparagine***                 | Asn  | C <sub>4</sub> H <sub>8</sub> N <sub>2</sub> O <sub>3</sub>                                     | 29.45                   | 133.0608        | 133.0608           | 0.0           | 0.2           |
| <b>38</b> | Tryptophan***                 | Trp  | C <sub>11</sub> H <sub>12</sub> N <sub>2</sub> O <sub>2</sub>                                   | 29.99                   | 205.0964        | 205.0972           | 4.7           | 3.7           |
| <b>39</b> | Methionine***                 | Met  | C <sub>5</sub> H <sub>11</sub> NO <sub>2</sub> S                                                | 30.14                   | 150.0589        | 150.0583           | 0.6           | 3.8           |
| <b>40</b> | Glutamine***                  | Gln  | C <sub>5</sub> H <sub>10</sub> N <sub>2</sub> O <sub>3</sub>                                    | 30.25                   | 147.0768        | 147.0764           | 0.4           | 2.6           |
| <b>41</b> | 2-Aminoadipic acid**          |      | C <sub>6</sub> H <sub>11</sub> NO <sub>4</sub>                                                  | 30.35                   | 162.0760        | 162.0761           | 0.1           | 0.5           |
| <b>42</b> | Acetylhomoserine <sup>†</sup> |      | C <sub>6</sub> H <sub>11</sub> NO <sub>4</sub>                                                  | 30.64                   | 162.0759        | 162.0761           | 0.2           | 1.1           |
| <b>43</b> | Citrulline**                  | Cit  | C <sub>6</sub> H <sub>13</sub> N <sub>3</sub> O <sub>3</sub>                                    | 30.68                   | 176.1027        | 176.1030           | 0.3           | 1.5           |
| <b>44</b> | Homocitrulline**              |      | C <sub>7</sub> H <sub>15</sub> N <sub>3</sub> O <sub>3</sub>                                    | 30.75                   | 190.1174        | 190.1186           | 1.2           | 6.4           |
| <b>45</b> | Glutamic acid***              | Glu  | C <sub>5</sub> H <sub>9</sub> NO <sub>4</sub>                                                   | 30.78                   | 148.0600        | 148.0604           | 0.4           | 2.9           |
| <b>46</b> | Phenylalanine***              | Phe  | C <sub>9</sub> H <sub>11</sub> NO <sub>2</sub>                                                  | 31.34                   | 166.0862        | 166.0863           | 0.1           | 0.3           |
| <b>47</b> | Acetyllysine <sup>†</sup>     |      | C <sub>8</sub> H <sub>16</sub> N <sub>2</sub> O <sub>3</sub>                                    | 31.63                   | 189.1236        | 189.1234           | 0.2           | 1.2           |
| <b>48</b> | Tyrosine***                   | Tyr  | C <sub>9</sub> H <sub>11</sub> NO <sub>3</sub>                                                  | 31.78                   | 182.0812        | 182.0812           | 0.0           | 0.2           |
| <b>49</b> | Proline***                    | Pro  | C <sub>5</sub> H <sub>9</sub> NO <sub>2</sub>                                                   | 32.38                   | 116.0704        | 116.0706           | 0.2           | 1.8           |
| <b>50</b> | Hypoxanthine**                | HPX  | C <sub>5</sub> H <sub>4</sub> N <sub>4</sub> O                                                  | 32.59                   | 137.0458        | 137.0458           | 0.0           | 0.1           |
| <b>51</b> | Ser-Val <sup>†</sup>          | SV   | C <sub>8</sub> H <sub>16</sub> N <sub>2</sub> O <sub>4</sub>                                    | 32.95                   | 205.1181        | 205.1183           | 0.2           | 0.9           |
| <b>52</b> | Aspartic acid***              | Asp  | C <sub>4</sub> H <sub>7</sub> NO <sub>4</sub>                                                   | 34.29                   | 134.0454        | 134.0448           | 0.6           | 4.6           |
| <b>53</b> | Glycine betaine*              | GB   | C <sub>5</sub> H <sub>11</sub> NO <sub>2</sub>                                                  | 35.02                   | 118.0860        | 118.0863           | 0.3           | 2.2           |
| <b>54</b> | Glutathione, oxidized**       | GSSG | C <sub>20</sub> H <sub>32</sub> N <sub>6</sub> O <sub>12</sub> S <sub>2</sub> ( <sup>2+</sup> ) | 35.72                   | 307.0836        | 307.0833           | 0.3           | 1.1           |
| <b>55</b> | Glutathione***                | GSH  | C <sub>10</sub> H <sub>17</sub> N <sub>3</sub> O <sub>6</sub> S                                 | 39.15                   | 308.0907        | 308.0911           | 0.4           | 1.2           |

Note: Asterisk (\*) signifies identifications based on migration-time comparison against related chemical standards. Double asterisk (\*\*) denotes identifications supplemented by tandem mass spectrometry experiments performed on related standards or data available in Metlin (<https://metlin.scripps.edu/>), Human metabolome database (<http://www.hmdb.ca/>), or mzCloud (<https://www.mzcloud.org/>), last accessed on Jan. 25, 2016. Dagger (†) indicates that the tandem mass spectrum agrees with fragmentation predicted in Mass Frontier 7.0 (Thermo Scientific). Double dagger (‡) indicates most probable assignment for endogenous metabolite based on mass-matches in Metlin (5 ppm accuracy).

**Table S3.** Fisher's least significant difference (LSD) analysis revealing differential metabolite extraction between polar<sub>pH4</sub>, apolar<sub>pH5</sub>, and apolar<sub>pH8</sub> solvents.

| <b>Metabolite</b> | <b>p value</b> | <b>Fisher's LSD</b>                                                                           |
|-------------------|----------------|-----------------------------------------------------------------------------------------------|
| <b>Methionine</b> | 0.0006         | Apolar <sub>pH5</sub> -Apolar <sub>pH8</sub> ;<br>Apolar <sub>pH5</sub> -Polar <sub>pH4</sub> |
| <b>Glutamate</b>  | 0.0003         | Apolar <sub>pH5</sub> -Apolar <sub>pH8</sub> ;<br>Apolar <sub>pH5</sub> -Polar <sub>pH4</sub> |
| <b>Glutamine</b>  | 0.0278         | Apolar <sub>pH5</sub> -Polar <sub>pH4</sub> ;<br>Apolar <sub>pH5</sub> -Apolar <sub>pH8</sub> |
| <b>SAM</b>        | 0.0077         | Apolar <sub>pH5</sub> -Polar <sub>pH4</sub>                                                   |
| <b>Citrulline</b> | 0.0163         | Apolar <sub>pH5</sub> -Polar <sub>pH4</sub>                                                   |
| <b>Alanine</b>    | 0.0322         | Apolar <sub>pH8</sub> -Polar <sub>pH4</sub> ;<br>Apolar <sub>pH8</sub> -Apolar <sub>pH5</sub> |
| <b>Ornithine</b>  | 0.0178         | Apolar <sub>pH8</sub> -Polar <sub>pH4</sub> ;<br>Apolar <sub>pH8</sub> -Apolar <sub>pH5</sub> |
| <b>Valine</b>     | 0.0038         | Apolar <sub>pH8</sub> -Polar <sub>pH4</sub> ;<br>Apolar <sub>pH5</sub> -Polar <sub>pH4</sub>  |
| <b>Threonine</b>  | 0.0074         | Apolar <sub>pH8</sub> -Polar <sub>pH4</sub> ;<br>Apolar <sub>pH5</sub> -Polar <sub>pH4</sub>  |
| <b>GSSG</b>       | 0.0225         | Apolar <sub>pH8</sub> -Apolar <sub>pH5</sub> ;<br>Polar <sub>pH4</sub> -Apolar <sub>pH5</sub> |
| <b>GB</b>         | 0.0190         | Apolar <sub>pH8</sub> -Polar <sub>pH4</sub>                                                   |
| <b>GSH</b>        | 0.0081         | Polar <sub>pH4</sub> -Apolar <sub>pH8</sub> ;<br>Polar <sub>pH4</sub> -Apolar <sub>pH5</sub>  |
| <b>HPX</b>        | 0.0077         | Polar <sub>pH4</sub> -Apolar <sub>pH8</sub> ;<br>Apolar <sub>pH5</sub> -Apolar <sub>pH8</sub> |

**Table S4.** Differentially enriched metabolites between D1L and D1R blastomeres in the 8-cell *Xenopus* embryo. Fold change (FC) vs. *p* value were calculated based on normalized peak areas and filtered for statistical and biological significance, *p* < 0.05 and FC ≥ 1.5 (see also **Fig. 4A**). Accurate mass and migration time (MT) values are provided for small molecules that are yet to be identified.

| Small Molecule<br><i>m/z</i> (MT, min) | FC    | log <sub>2</sub> (FC) | <i>p</i> | -10×log <sub>10</sub> ( <i>p</i> ) | Solvent               |
|----------------------------------------|-------|-----------------------|----------|------------------------------------|-----------------------|
| Acetylcarnitine                        | 0.539 | -0.891                | 0.002104 | 26.77                              | Apolar <sub>pH5</sub> |
| Creatine                               | 0.387 | -1.369                | 0.001198 | 29.22                              | Apolar <sub>pH5</sub> |
| Putrescine                             | 0.487 | -1.038                | 0.017126 | 17.66                              | Apolar <sub>pH5</sub> |
| Spermidine                             | 0.035 | -4.852                | 0.000704 | 31.52                              | Apolar <sub>pH5</sub> |
| SAM                                    | 0.602 | -0.732                | 0.000581 | 32.36                              | Polar <sub>pH4</sub>  |
| 255.1550 (15.32)                       | 0.140 | -2.834                | 3.36E-05 | 44.73                              | Apolar <sub>pH5</sub> |
| 285.1664 (15.92)                       | 0.208 | -2.266                | 0.000807 | 30.93                              | Apolar <sub>pH5</sub> |
| 106.0860 (17.1)                        | 0.224 | -2.157                | 2.8E-05  | 45.52                              | Apolar <sub>pH5</sub> |
| 186.1125 (20.54)                       | 0.167 | -2.579                | 8.08E-06 | 50.93                              | Apolar <sub>pH5</sub> |
| 172.0943 (20.65)                       | 0.077 | -3.702                | 0.019707 | 17.05                              | Apolar <sub>pH5</sub> |
| 104.0705 (23.98)                       | 0.257 | -1.957                | 0.036122 | 14.42                              | Apolar <sub>pH5</sub> |
| 262.1646 (24.05)                       | 0.373 | -1.423                | 0.014958 | 18.25                              | Apolar <sub>pH5</sub> |
| 137.0297 (12.41)                       | 0.137 | -2.867                | 0.005169 | 22.87                              | Apolar <sub>pH8</sub> |
| 400.6067 (13.3)                        | 0.230 | -2.118                | 0.029715 | 15.27                              | Apolar <sub>pH8</sub> |
| 90.0550 (16.43)                        | 0.195 | -2.355                | 0.001344 | 28.72                              | Polar <sub>pH4</sub>  |
| 106.0860 (17.13)                       | 0.433 | -1.209                | 0.03467  | 14.60                              | Polar <sub>pH4</sub>  |
| 162.1127 (19.22)                       | 0.202 | -2.309                | 0.000224 | 36.50                              | Polar <sub>pH4</sub>  |
| 138.0552 (30.93)                       | 0.239 | -2.064                | 0.028664 | 15.43                              | Polar <sub>pH4</sub>  |
| Ethanolamine                           | 1.518 | 0.602                 | 0.009845 | 20.07                              | Apolar <sub>pH5</sub> |
| GABA                                   | 3.095 | 1.630                 | 0.007152 | 21.46                              | Apolar <sub>pH5</sub> |
| GABA                                   | 2.968 | 1.569                 | 0.012432 | 19.05                              | Apolar <sub>pH8</sub> |
| Isoleucine                             | 2.079 | 1.056                 | 0.023224 | 16.34                              | Apolar <sub>pH5</sub> |
| Leucine                                | 2.411 | 1.269                 | 0.029559 | 15.29                              | Apolar <sub>pH5</sub> |
| Trolamine                              | 1.989 | 0.992                 | 0.000835 | 30.78                              | Polar <sub>pH4</sub>  |
| 75.0755 (14.62)                        | 8.500 | 3.087                 | 0.001058 | 29.76                              | Apolar <sub>pH5</sub> |
| 170.0962 (17.78)                       | 1.725 | 0.786                 | 0.039921 | 13.99                              | Apolar <sub>pH5</sub> |
| 106.0860 (18.15)                       | 5.320 | 2.411                 | 0.032642 | 14.86                              | Apolar <sub>pH5</sub> |
| 184.1120 (18.15)                       | 1.856 | 0.892                 | 0.043493 | 13.62                              | Apolar <sub>pH5</sub> |
| 425.1888 (27.64)                       | 2.814 | 1.492                 | 0.035694 | 14.47                              | Apolar <sub>pH5</sub> |
| 138.0552 (30.92)                       | 1.632 | 0.706                 | 0.017684 | 17.52                              | Apolar <sub>pH5</sub> |
| 180.1496 (13.45)                       | 1.520 | 0.604                 | 0.016443 | 17.84                              | Apolar <sub>pH8</sub> |
| 150.0551 (19.82)                       | 1.570 | 0.651                 | 0.038984 | 14.09                              | Apolar <sub>pH8</sub> |
| 146.1176 (16.52)                       | 4.436 | 2.149                 | 0.012419 | 19.06                              | Apolar <sub>pH8</sub> |
| 144.0479 (14.45)                       | 1.821 | 0.865                 | 0.018954 | 17.22                              | Apolar <sub>pH8</sub> |
| 138.0552 (23.58)                       | 1.629 | 0.704                 | 0.023697 | 16.25                              | Apolar <sub>pH8</sub> |

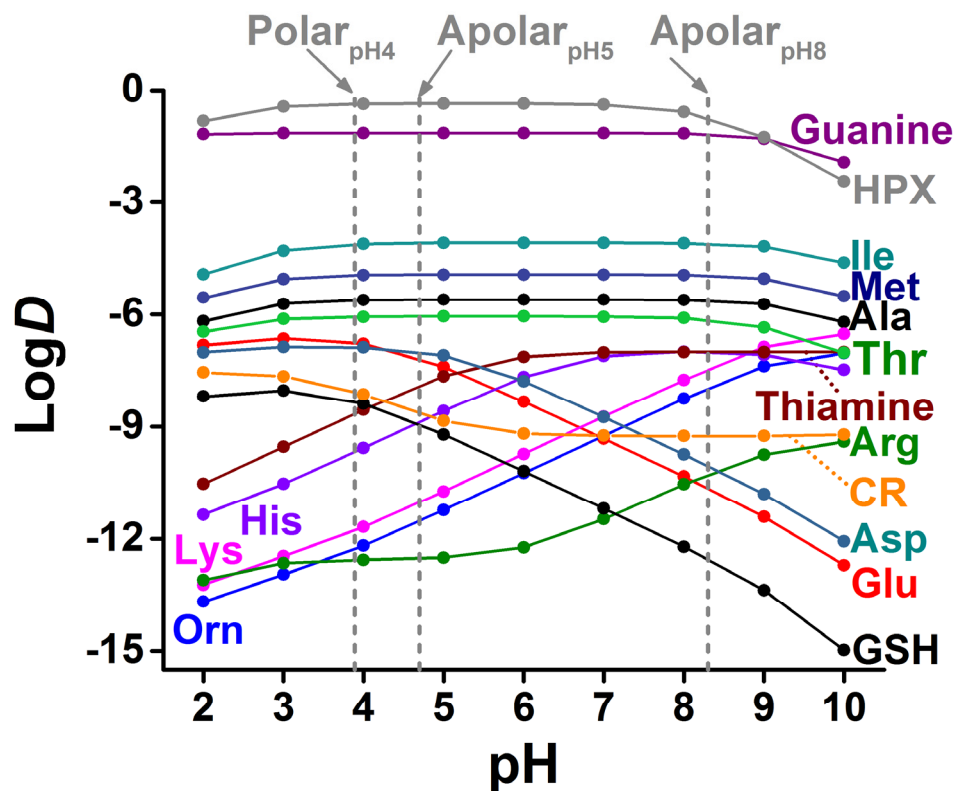

**Figure S1.** Octanol/water distribution coefficients ( $D$ ) calculated as a function of pH. To facilitate the detection of metabolites, extraction solvents with complementary polarity and pH characteristics were used in this study: 50% (v/v) methanol with pH 3.89 ( $\text{polar}_{\text{pH4}}$ ); 40% (v/v) acetonitrile and 40% (v/v) methanol with pH 4.7 ( $\text{apolar}_{\text{pH5}}$ ); 40% (v/v) acetonitrile and 40% (v/v) methanol with pH 8.3 ( $\text{apolar}_{\text{pH8}}$ ). Key: CR, creatine; HPX, hypoxanthine; GSH, glutathione.

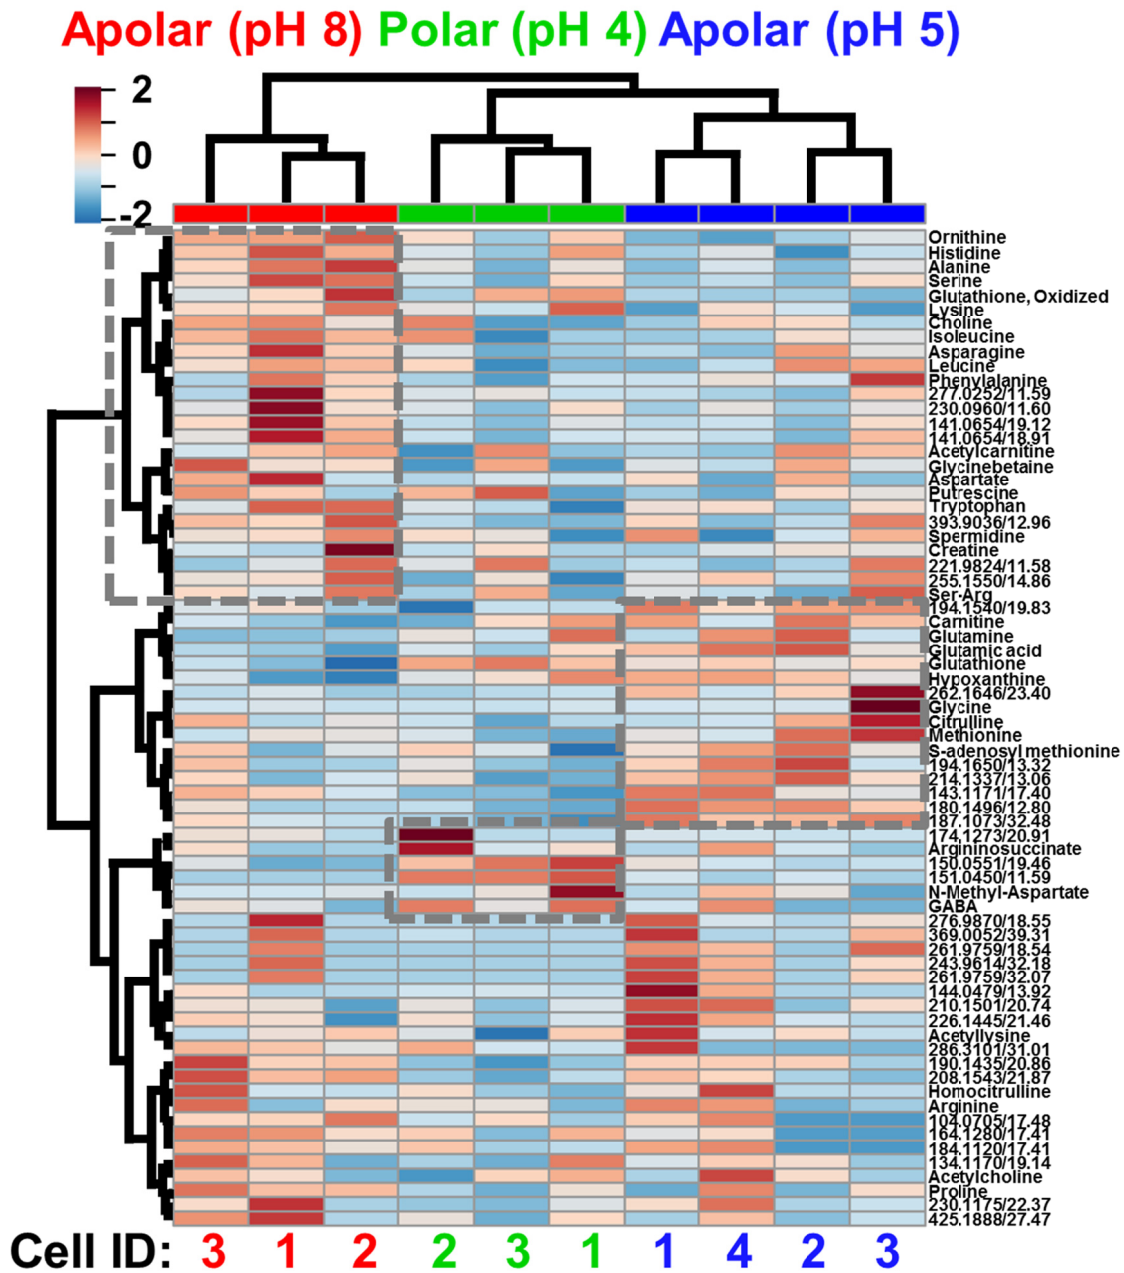

**Figure S2.** HCA-heatmap showing differential metabolite extraction from single D1R blastomeres using the three solvents. Individual blastomeres are labeled using their unique identifier (see Cell ID). Small molecules that have yet to be identified are labeled with accurate mass ( $m/z$  value)/migration time (min) information.
